# Supplementary material
Source: HighWire-hosted journal article supplement (https://jech.bmj.com/content/72/10/933)
Supplement: inline-supplementary-material-2 [file inline-supplementary-material-2.pdf]

Supplementary File 2

Estimated prevalence by mental health risk score and level of social support

|                                                    | Depressive Symptoms (EPDS $\geq 10$ ) at 4 mo. |                                           |                             |                           | Elevated Anxiety (SSAI $\geq 40$ ) at 4 mo. |                                           |                             |                           |
|----------------------------------------------------|------------------------------------------------|-------------------------------------------|-----------------------------|---------------------------|---------------------------------------------|-------------------------------------------|-----------------------------|---------------------------|
| Prenatal Cumulative Mental Health Risk Factors ‡   | Estimated prevalence among High Support †      | Estimated prevalence among Low Support ** | Estimated Risk Difference § | Number Needed to Treat †† | Estimated prevalence among High Support †   | Estimated prevalence among Low Support ** | Estimated Risk Difference § | Number Needed to Treat †† |
| 0                                                  | 3.8%                                           | 5.6%                                      | 1.9%                        | 54                        | 4.5%                                        | 7.3%                                      | 2.8%                        | 36                        |
| 1                                                  | 9.4%                                           | 14.2%                                     | 4.7%                        | 22                        | 11.6%                                       | 18.9%                                     | 7.3%                        | 14                        |
| 2                                                  | 17.3%                                          | 25.9%                                     | 8.6%                        | 12                        | 22.1%                                       | 36.0%                                     | 13.9%                       | 8                         |
| 3 or 4                                             | 28.6%                                          | 42.9%                                     | 14.3%                       | 7                         | 34.7%                                       | 56.5%                                     | 21.9%                       | 5                         |
|                                                    | Depressive Symptoms (EPDS $\geq 10$ ) at 1 yr  |                                           |                             |                           | Elevated Anxiety (SSAI $\geq 40$ ) at 1 yr  |                                           |                             |                           |
| Postpartum Cumulative Mental Health Risk Factors ¥ | Estimated prevalence among High Support †      | Estimated prevalence among Low Support ** | Estimated Risk Difference § | Number Needed to Treat †† | Estimated prevalence among High Support †   | Estimated prevalence among Low Support ** | Estimated Risk Difference § | Number Needed to Treat †† |
| 0                                                  | 5.2%                                           | 6.4%                                      | 1.2%                        | 86                        | 9.0%                                        | 15.0%                                     | 5.9%                        | 17                        |
| 1                                                  | 15.3%                                          | 18.8%                                     | 3.5%                        | 29                        | 18.2%                                       | 30.1%                                     | 11.9%                       | 9                         |
| 2                                                  | 29.8%                                          | 36.6%                                     | 6.7%                        | 15                        | 33.6%                                       | 55.5%                                     | 22.0%                       | 5                         |
| 3 or 4                                             | 43.3%                                          | 53.1%                                     | 9.8%                        | 11                        | 36.0%                                       | 59.6%                                     | 23.6%                       | 5                         |

Calculations used to determine estimated prevalences, estimated risk differences and number needed to treat using risk ratio models from Table 2

‡ history of treatment of depression, four or more ACEs, depressive or anxiety symptoms during pregnancy

¥ history of treatment of depression, four or more ACEs, depressive or anxiety symptoms at 4 months postpartum

† Baseline prevalence \* RR for mental health

\*\* Baseline prevalence \* RR for mental health \* RR for low support

§ Estimated prevalence among low support - estimated prevalence among high support

†† 1/RD
